# Supplementary material
Source: MDPI journal article supplement (https://www.mdpi.com/2073-4441/12/7/2050)
Supplement: s1 [file s1]

**COMPREHENSIVE LIST OF CHANGES**

| <b>PAGE</b> | <b>NOTE</b> | <b>EDITORS' COMMENTS</b>                                                                                       | <b>AUTHORS' ANSWERS</b>                                                                                                                                                                                                                                                      |
|-------------|-------------|----------------------------------------------------------------------------------------------------------------|------------------------------------------------------------------------------------------------------------------------------------------------------------------------------------------------------------------------------------------------------------------------------|
| 1           | 1           | Note change in title                                                                                           | We agree, because it was changed following a reviewer suggestion                                                                                                                                                                                                             |
| 1           | 2           | Please carefully check the accuracy of names and affiliations. Changes will not be possible after proofreading | Checked. An update of the affiliation for the first author (see in the document) has been made.                                                                                                                                                                              |
| 4           | 3           | We removed capitalized format, please confirm                                                                  | Confirmed                                                                                                                                                                                                                                                                    |
| 4           | 4           | Define if appropriate                                                                                          | We think it is not necessary. They are defined in the cited reference                                                                                                                                                                                                        |
| 7           | 5           | We removed capitalized format, please confirm.                                                                 | Confirmed. The word "translated" could be changed to lowercase initial                                                                                                                                                                                                       |
| 10          | 6           | Define if appropriate                                                                                          | It was defined in the previous sentence: Chinese Academy of Sciences. We include the acronym after the term into the previous sentence                                                                                                                                       |
| 11          | 7           | Define if appropriate                                                                                          | Ok, we have defined the SGEM acronym                                                                                                                                                                                                                                         |
| 11          | 8           | Define if appropriate                                                                                          | Ok, we have defined all those acronyms                                                                                                                                                                                                                                       |
| 11          | 9           | Please add the corresponding number                                                                            | He has not a <i>ResearchGate</i> profile; so he has not a RG number                                                                                                                                                                                                          |
| 12          | 10          | Is the italics necessary?                                                                                      | No, it is not necessary. It can be changed                                                                                                                                                                                                                                   |
| 12          | 11          | Is the bold necessary?                                                                                         | No, it is not necessary. It can be changed                                                                                                                                                                                                                                   |
| 14          | 12          | Define if appropriate                                                                                          | We think it is not necessary. It is defined in the cited reference                                                                                                                                                                                                           |
| 15          | 13          | We removed capitalized format, please confirm.                                                                 | Confirmed                                                                                                                                                                                                                                                                    |
| 15          | 14          | Can this be normal font?                                                                                       | Yes, it can be normal font. You can change it                                                                                                                                                                                                                                |
| 15          | 15          | Is the vertical position necessary?                                                                            | No, it is not necessary, but we think that vertical position is better for the table composition                                                                                                                                                                             |
| 15          | 16          | Is the bold necessary?                                                                                         | No, it is not necessary. It can be changed                                                                                                                                                                                                                                   |
| 15          | 17          | Do the asterisk have an explanation? Is yes, please add it as table footnote.                                  | Yes, the asterisk is a commonly used wildcard symbol that broadens a search by finding words that start with the same letters. We have used it with distinctive word stems to retrieve variations of a term with less typing. We have added a sentence in the table footnote |
| 18          | 18          | We removed capitalized format, please confirm.                                                                 | Confirmed                                                                                                                                                                                                                                                                    |
| 18          | 19          | Do the asterisk have an explanation? If yes, please add table                                                  | Yes, the asterisk is a commonly used wildcard symbol that                                                                                                                                                                                                                    |

|    |           |                                                                                                                                  |                                                                                                                                                                                                                                                               |
|----|-----------|----------------------------------------------------------------------------------------------------------------------------------|---------------------------------------------------------------------------------------------------------------------------------------------------------------------------------------------------------------------------------------------------------------|
|    |           | footnote.                                                                                                                        | broadens a search by finding words that start with the same letters. We have used it with distinctive word stems to retrieve variations of a term with less typing. We have added a sentence in the table footnote                                            |
| 20 | <b>20</b> | Is the italics necessary?                                                                                                        | No, it is not necessary. It can be changed                                                                                                                                                                                                                    |
| 21 | <b>21</b> | Define if appropriate                                                                                                            | We have defined DEM only the first time it appears                                                                                                                                                                                                            |
| 21 | <b>22</b> | Define if appropriate                                                                                                            | Ok, we have defined MERIT acronym.                                                                                                                                                                                                                            |
| 21 | <b>23</b> | Define if appropriate                                                                                                            | Ok, we have change the words order of the sentence, and change the BEST acronym by its own name (Bare-Earth DEM)                                                                                                                                              |
| 23 | <b>24</b> | Define if appropriate                                                                                                            | We think it is not appropriate, because it would lengthen the text unnecessarily, and they are acronyms well known by the scientific-technical community                                                                                                      |
| 23 | <b>25</b> | Define if appropriate                                                                                                            | We think it is not appropriate, it is the acronym of a flood damage model in Netherlands language, and it is an acronyms well known by the scientific-technical community                                                                                     |
| 23 | <b>26</b> | Define if appropriate                                                                                                            | Ok, we have defined FEMO acronym                                                                                                                                                                                                                              |
| 23 | <b>27</b> | Define if appropriate                                                                                                            | Ok, we have defined HAZUS-MH acronym                                                                                                                                                                                                                          |
| 24 | <b>28</b> | This was a collection of papers on this subject submitted on the MDPI website; please state the ones you mentioned in the paper. | We refer to the Editorial paper to be included in the Special Issue "Flood Risk Assessments: Applications and Uncertainties", already under edition, but without DOI number. Please, add it when the complete reference will be established by the IS editors |
| 24 | <b>29</b> | Please add volume and confirm pages.                                                                                             | It has been completed, adding the volume and pages.                                                                                                                                                                                                           |
| 25 |           | (text highlighted in yellow)                                                                                                     | We don't understand what does it mean and if any changes are necessary                                                                                                                                                                                        |
| 26 | <b>30</b> | Is this necessary? Can this be deleted.?                                                                                         | No, it is not necessary. It can be deleted                                                                                                                                                                                                                    |
